# Supplementary material
Source: publisher figshare collection journal article supplement (https://acs.figshare.com/ndownloader/files/7440049)
Supplement: Supplementary file 1 [file 7440049]

## **Supporting Information:**

### **Dual-Function Polymeric HPMA Prodrugs for the Delivery of miRNA**

Zheng-Hong Peng, Ying Xie, Yan Wang, Jing Li, David Oupický\*

Center for Drug Delivery and Nanomedicine, Department of Pharmaceutical Sciences, University of Nebraska Medical Center, Omaha, Nebraska 68198.

\*Corresponding author (David. Oupický):

*E-mail address:* [david.oupicky@unmc.edu](mailto:david.oupicky@unmc.edu)

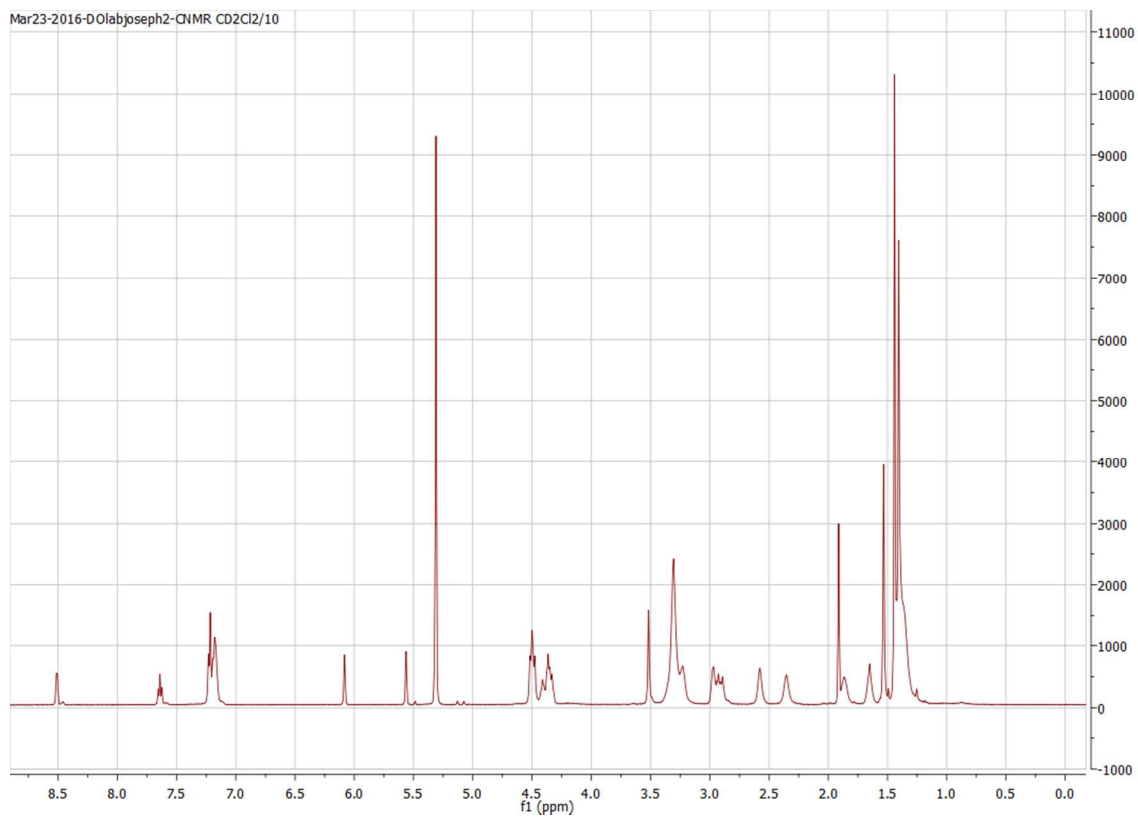

**Figure S1.**  $^1\text{H}$  NMR of monomer MA-SS-AMD.

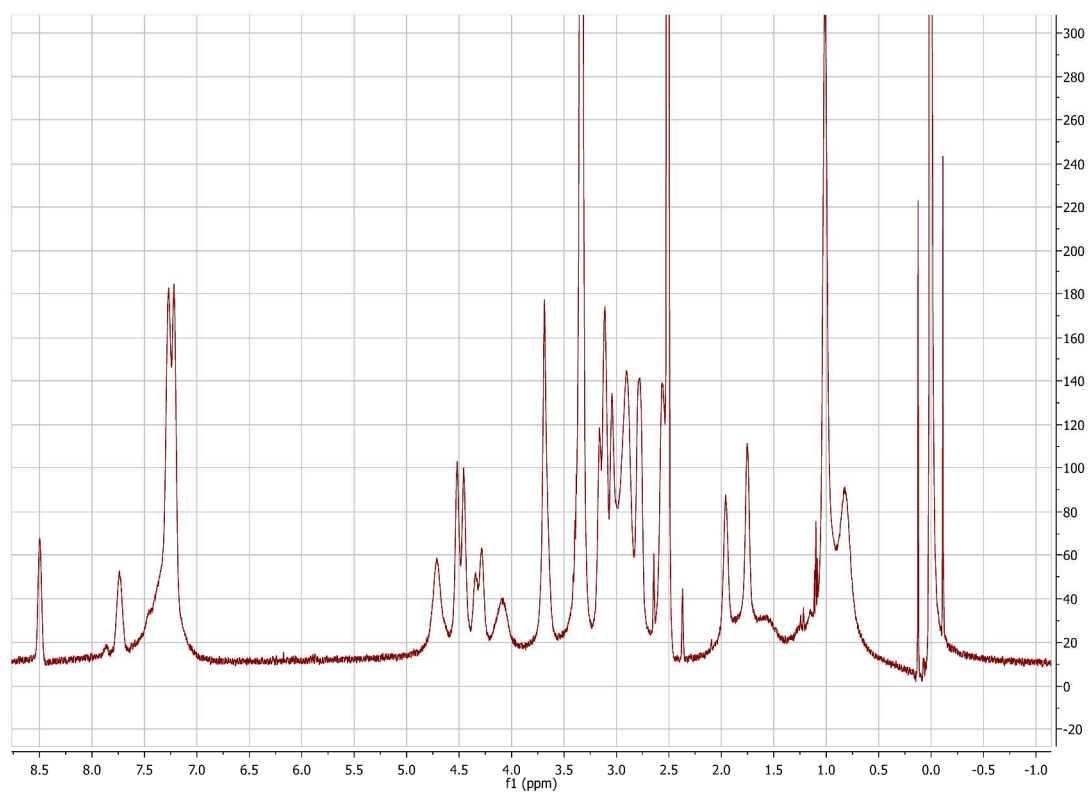

**Figure S2.**  $^1\text{H}$  NMR of polymer P-SS-AMD.

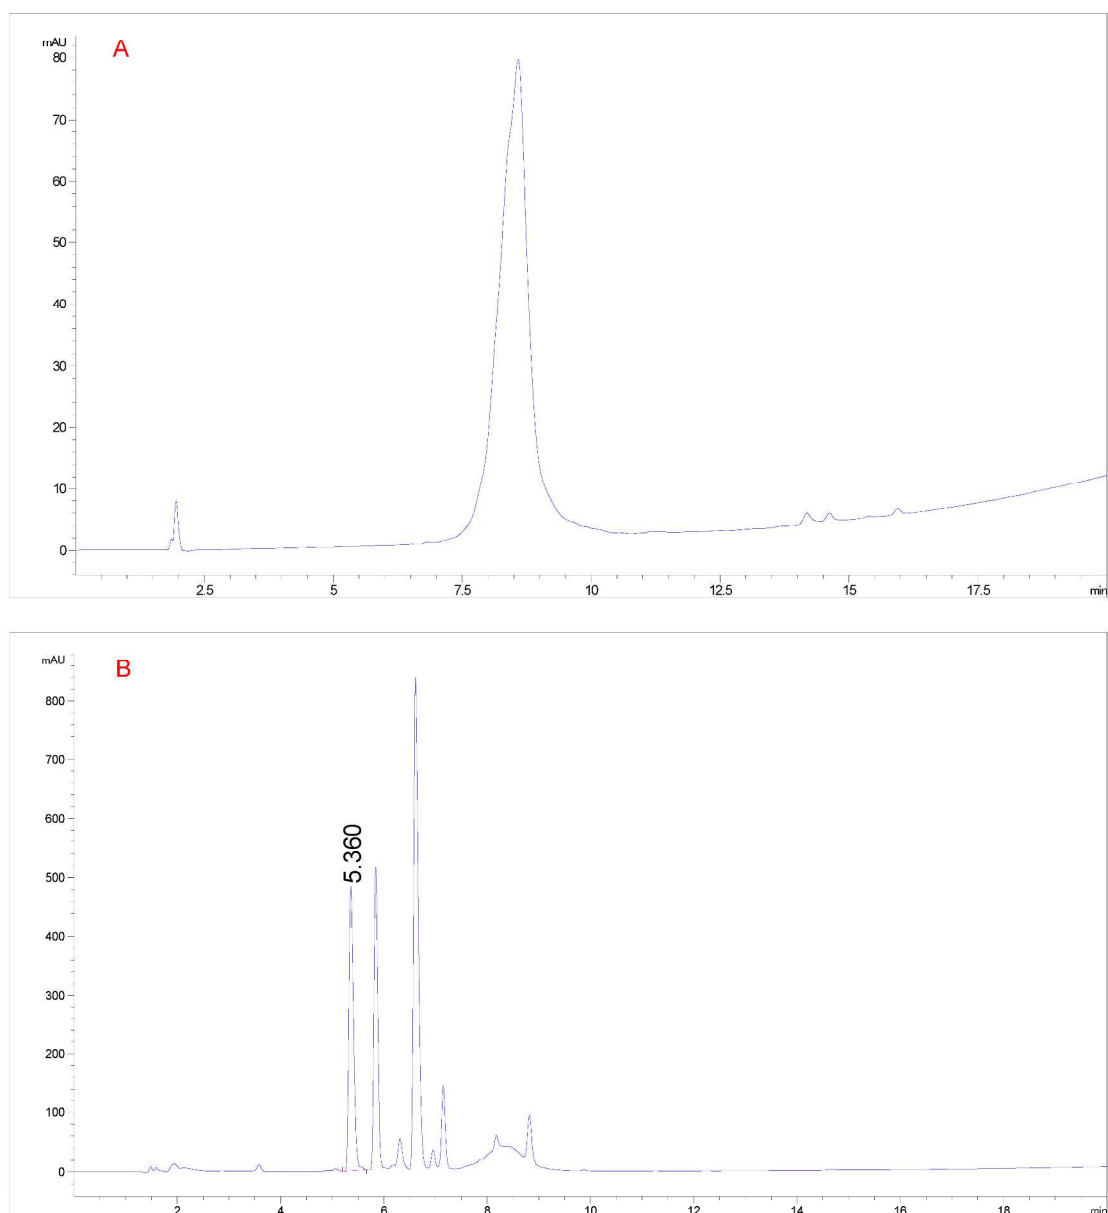

**Figure S3.** HPLC profile of polymer P-SS-AMD without (A) or with (B) incubation with GSH for 24h.

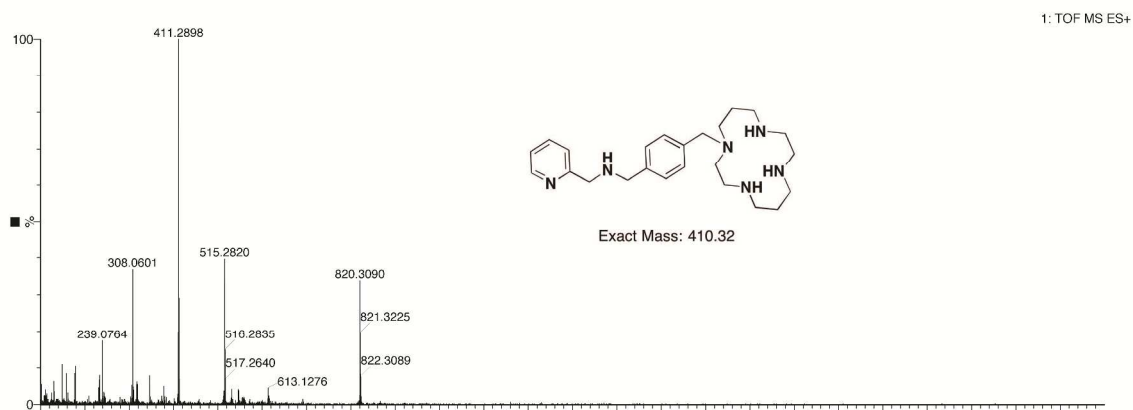

**Figure S4.** Mass Spectrometry of the release product at 5.360 min in Figure S3B.

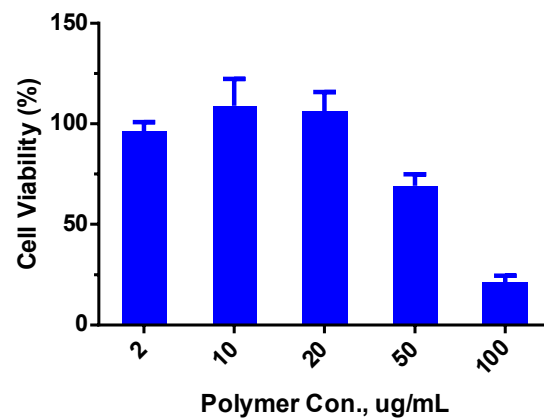

**Figure S5.** Cytotoxicity of the polymer P-SS-AMD. U2OS cells were treated with increasing concentrations of P-SS-AMD in culture media for 24 h before measuring cell viability using Cell Titer Blue assay.

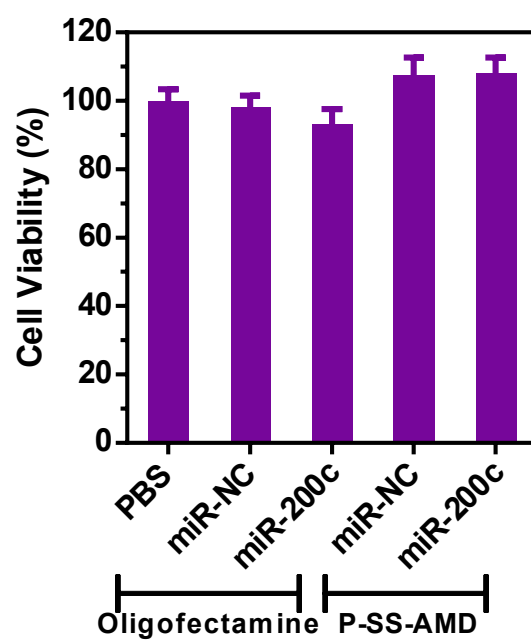

**Figure S6.** Cytotoxicity of the polyplexes. U2OS cells were treated with PBS, Oligofectamine/miR-NC, Oligofectamine/miR-200c, P-SS-AMD/miR-200c or P-SS-AMD/miR-200c for 48 h before measuring cell viability using Cell Titer Blue assay.
